# Supplementary material for: Closing schools for SARS-CoV-2: a pragmatic rapid recommendation
Source: HighWire-hosted journal article supplement (doi:10.1136/bmjpo-2020-000971), 2021-02-01
Supplement: bmjpo-2020-000971supp002_data_supplement.pdf [file bmjpo-2020-000971supp002_data_supplement.pdf]

## Appendix 2. GRADE ratings and detailed data

| Outcome                                      | Study                                        | Characteristics                                                                                                            | Results                                                                                                                                                                                                          | GRADE-rating                                                                                                                                                                            | Final GRADE        |
|----------------------------------------------|----------------------------------------------|----------------------------------------------------------------------------------------------------------------------------|------------------------------------------------------------------------------------------------------------------------------------------------------------------------------------------------------------------|-----------------------------------------------------------------------------------------------------------------------------------------------------------------------------------------|--------------------|
| Learning delay                               | Maldonado & De Witte, 2020                   | Standardized tests in children in the last grade primary school.<br>Comparing cohort 2020 to previous cohorts 2015 to 2019 | <u>Learning loss in 2020</u><br>Social science: 0.33 SD<br>French: 0.3 SD<br>Dutch 0.29 SD<br>Math: 0.19 SD<br><br>- results were robust across different models<br>- inequality within and between schools rose | Observational research<br>No serious limitations<br>No serious indirectness<br>No serious inconsistency<br>No serious imprecision<br>Large effect (+0.5)<br>Residual confounding (+0.5) | Moderate certainty |
| Child abuse (different sources 2020 vs 2019) | 1. Child Focus                               | Number of reports on images of sexual abuse                                                                                | During lockdown 679 reports vs 256 during same months in 2019 (+165%)                                                                                                                                            | Observational research<br>No serious limitations<br>No serious indirectness <sup>1</sup><br>No serious inconsistency<br>No serious imprecision                                          | Low certainty      |
|                                              | 2. CLBch@t                                   | Number of chats on abuse at helpline for students                                                                          | During lockdown 79 reports vs 61 during same months in 2019 (+30%)                                                                                                                                               |                                                                                                                                                                                         |                    |
|                                              | 3. helpline 1712                             | Number of persons contacting this helpline on abuse                                                                        | During lockdown +44% reports compared to same months in 2019                                                                                                                                                     |                                                                                                                                                                                         |                    |
| Child abuse (Sept 2020 vs May 2020)          | 4. helpline (sexual) abuse of children       | Number of persons contacting this helpline (nupraatikerover.be)                                                            | In May 2020 100 reports vs 65 in September 2020 (+54%)                                                                                                                                                           |                                                                                                                                                                                         |                    |
| COVID infections                             | National surveillance data; CLB for teachers | Number of persons with a positive test                                                                                     | reported in paper                                                                                                                                                                                                | Observational research<br>No serious limitations<br>Serious indirectness <sup>2</sup><br>No serious inconsistency                                                                       | Very low certainty |

|                        |                       |                                                                             |                                                                                                                                                                                                                                        |                                                                                                                                             |                    |
|------------------------|-----------------------|-----------------------------------------------------------------------------|----------------------------------------------------------------------------------------------------------------------------------------------------------------------------------------------------------------------------------------|---------------------------------------------------------------------------------------------------------------------------------------------|--------------------|
|                        |                       |                                                                             |                                                                                                                                                                                                                                        | No serious imprecision                                                                                                                      |                    |
| Mental health children | 'Grote Corona Studie' | Survey among children                                                       | reported in paper                                                                                                                                                                                                                      | Observational research<br>No serious limitations<br>Serious indirectness <sup>2</sup>                                                       | Very low certainty |
|                        | CLBch@t               | Number of chats (May vs September 2020) (Lockdown 2020 vs same months 2019) | <u>Per 14 days (May vs September):</u><br>depression: 16 vs 5<br>anxiety: 16 vs 9<br>suicidal thoughts: 18 vs 15<br><u>Per 6 months (2020 vs 2019)</u><br>depression: 169 vs 82<br>anxiety: 139 vs 35<br>suicidal thoughts: 190 vs 137 | No serious inconsistency<br>Serious imprecision <sup>3</sup>                                                                                |                    |
| Child neglect          | CLB reports           | Interventions because of physical or mental neglect                         | In 2020, +32%                                                                                                                                                                                                                          | Observational research<br>No serious limitations<br>Serious indirectness <sup>2</sup><br>No serious inconsistency<br>No serious imprecision | Very low certainty |

1: Data from Sept 2020 vs May 2020 yield very similar results compared to data from 2020 vs 2019

2: In May 2020 multiple corona measures were in place; with this data we cannot disentangle the effect of closing schools only on these outcomes

3: Data May vs September 2020 is based on low numbers
